# Supplementary material
Source: HighWire-hosted journal article supplement (http://rc.rcjournal.com/highwire/filestream/16334/field_highwire_adjunct_files/0/suppl_1.pdf)
Supplement: suppl_1.pdf [file suppl_1.pdf]

**Supplemental table 1. Characteristics of subjects with VAEs categorized by pulmonary edema**

|                                         | All<br>(N=85)       | Non-pulmonary edema<br>(N=66) | Pulmonary edema<br>(N=19) | <i>P</i> value |
|-----------------------------------------|---------------------|-------------------------------|---------------------------|----------------|
| <b>Basic data</b>                       |                     |                               |                           |                |
| Age (years)                             | 66 (53-79.5)        | 64 (51-78)                    | 73 (63-87)                | 0.02           |
| Male                                    | 69 (81.2%)          | 56 (84.8%)                    | 13 (68.4%)                | 0.20           |
| Body weight (kg)                        | 60 (50-73.6)        | 59.9 (50.4-72.3)              | 61.5 (50-78.2)            | 0.77           |
| Malignancy                              | 32 (37.6%)          | 21 (31.8%)                    | 11 (57.9%)                | 0.07           |
| Type II diabetes mellitus               | 23 (27.1%)          | 19 (28.8%)                    | 4 (21.1%)                 | 0.71           |
| Cerebrovascular disease                 | 15 (17.6%)          | 11 (16.7%)                    | 4 (21.1%)                 | 0.92           |
| Chronic airway disease                  | 11 (12.9%)          | 8 (12.1%)                     | 3 (15.8%)                 | 0.98           |
| End-stage renal disease                 | 8 (9.4%)            | 6 (9.1%)                      | 2 (10.5%)                 | >0.99          |
| Congestive heart failure                | 11 (12.9%)          | 7 (10.6%)                     | 4 (21.1%)                 | 0.42           |
| <b>Etiologies of ICU-admission</b>      |                     |                               |                           | 0.39           |
| Pneumonia                               | 61 (71.8%)          | 47 (71.2%)                    | 14 (73.7%)                |                |
| COPD with ventilatory failure           | 3 (3.5%)            | 3 (4.5%)                      | 0                         |                |
| Sepsis, non-pulmonary                   | 3 (3.5%)            | 1 (1.5%)                      | 2 (10.5%)                 |                |
| Cardiogenic shock                       | 6 (7.1%)            | 5 (7.6%)                      | 1 (5.3%)                  |                |
| Shock, non-septic/non-cardiogenic       | 3 (3.5%)            | 2 (3.0%)                      | 1 (5.3%)                  |                |
| Respiratory failure                     | 9 (10.6%)           | 8 (12.1%)                     | 1 (5.3%)                  |                |
| <b>Laboratory data and severity</b>     |                     |                               |                           |                |
| White blood cell count (count/ $\mu$ l) | 13380 (8395-17985)  | 14000 (8922.5-18415)          | 9320 (5440-14840)         | 0.09           |
| Hemoglobin (g/dL)                       | 9.5 (8-11.6)        | 9.9 (8.3-12.3)                | 8.8 (8-9.7)               | 0.04           |
| Platelet ( $10^3/\mu$ L)                | 182 (97.5-280500)   | 189 (105.8-297.3)             | 135 (70-265)              | 0.28           |
| Albumin (mg/dL)                         | 2.5 (2.1-2.9)       | 2.4 (2.1-2.9)                 | 2.7 (2.1-2.9)             | 0.61           |
| Creatinine (mg/dL)                      | 1.3 (0.8-2.6)       | 1.2 (0.8-2.3)                 | 2.1 (1.1-4.4)             | 0.10           |
| C-reactive protein (mg/dL)              | 13.6 (6.6-22.1)     | 14.6 (7-23.5)                 | 8.9 (3.5-16.8)            | 0.21           |
| Lactate (mg/dL)                         | 19.5 (11.8-34.9)    | 21 (14-35.3)                  | 16.9 (10.6-27.8)          | 0.53           |
| APACHE II                               | 28 (23-32.5)        | 27 (21.8-31.3)                | 31 (26-35)                | <0.01          |
| PaO <sub>2</sub> /FiO <sub>2</sub>      | 241.8 (165.3-320.4) | 239.8 (169.9-324)             | 253.8 (122.2-301.7)       | 0.83           |
| <b>Management and outcomes</b>          |                     |                               |                           |                |
| Renal replacement therapy               | 16 (18.8%)          | 8 (12.1%)                     | 8 (42.1%)                 | <0.01          |
| Ventilator-day (days)                   | 19 (11-33.5)        | 18.5 (11-35.3)                | 19 (11-29)                | 0.92           |
| ICU-stay (days)                         | 19 (13-28)          | 18.5 (13-28.3)                | 20 (9-27)                 | 0.90           |
| Hospital-stay (days)                    | 37 (20-51)          | 38 (20-50.5)                  | 31 (19-52)                | 0.86           |
| Hospital-mortality                      | 55 (64.7%)          | 39 (59.1%)                    | 16 (84.2%)                | 0.08           |

Data are presented as median (interquartile range) and N (%). VAE: ventilator-associated event; PVAP: possible ventilator-associated pneumonia; COPD: chronic obstructive pulmonary disease; ICU: intensive care unit; APACHEII: acute physiology and chronic health evaluation; ARDS: acute respiratory distress syndrome.
